# Supplementary material for: Saliva viral load is a dynamic unifying correlate of COVID-19 severity and mortality
Source: PubMed Central journal article supplement (PMC7805468; doi:10.1101/2021.01.04.21249236), 2021-01-10

# Extended Figure 1

○ Does not have COVID-19 Health Risk Factor  
● Has COVID-19 Health Risk Factor

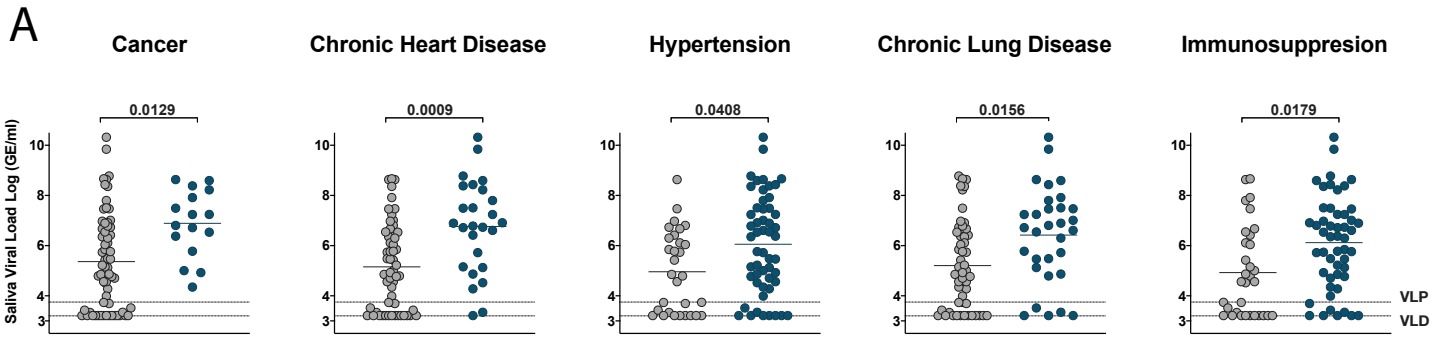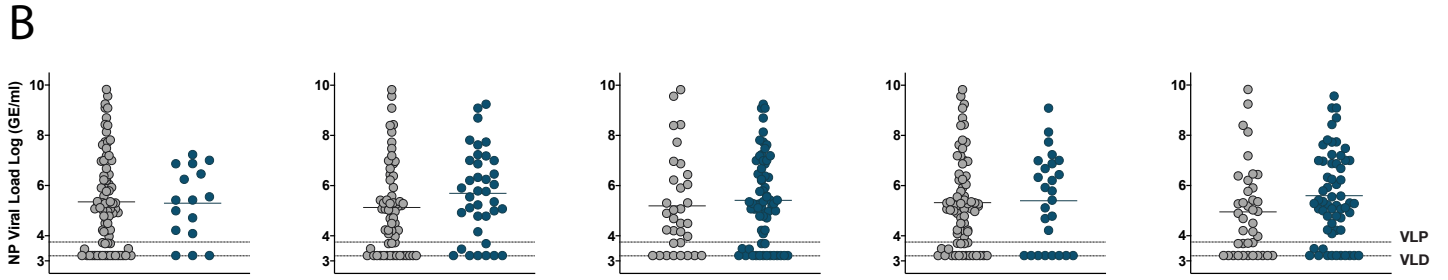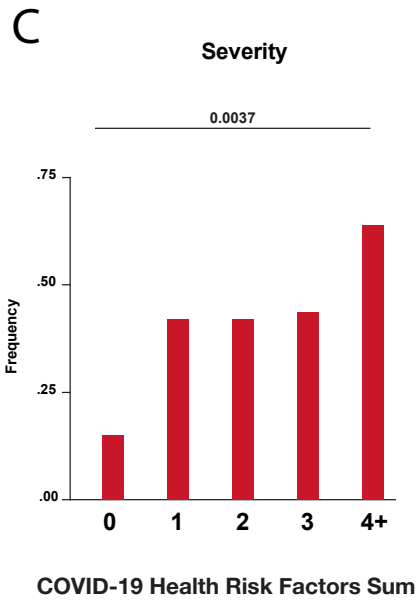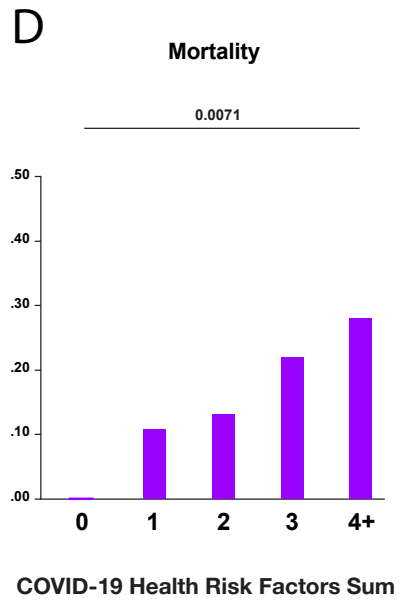

# Extended Figure 2:

## Mortality

— Saliva Viral Load  
— NP Viral Load  
— Age

### A

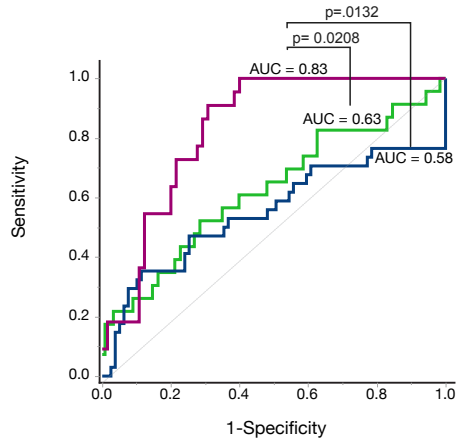

### B

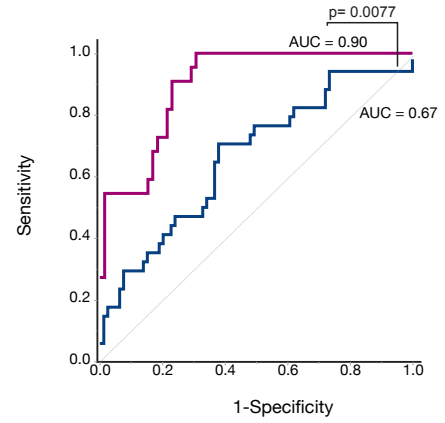

## Spectrum of Severity

— Moderate  
— Severe  
— Fatal

### C

#### Saliva Viral Load

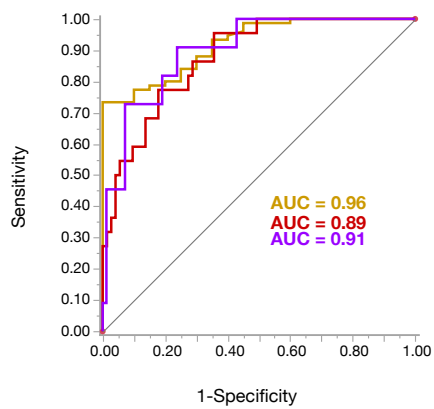

### D

#### NP Viral Load

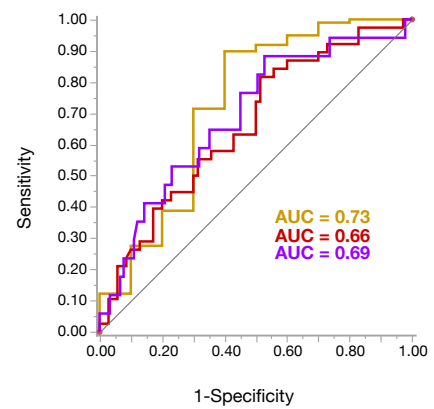

# Extended Figure 3

A

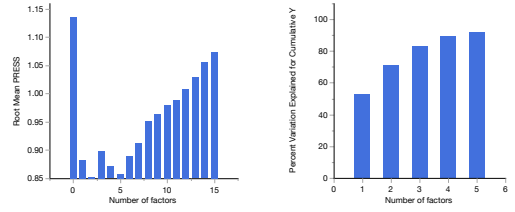

| Number of factors | Root Mean PRESS | van der Voet T <sup>2</sup> | Prob > van der Voet T <sup>2</sup> | Q <sup>2</sup> | Cumulative Q <sup>2</sup> | R <sup>2</sup> X | Cumulative R <sup>2</sup> X | R <sup>2</sup> Y | Cumulative R <sup>2</sup> Y | Method | Number of rows | Percent Variation Explained for Cumulative X | Percent Variation Explained for Cumulative Y | Number of VIP > 0.8 |
|-------------------|-----------------|-----------------------------|------------------------------------|----------------|---------------------------|------------------|-----------------------------|------------------|-----------------------------|--------|----------------|----------------------------------------------|----------------------------------------------|---------------------|
| 0                 | 1.135           | 7.698                       | 0.0060*                            | -0.120         | -0.120                    | 0                | 0                           | 0                | 0                           |        |                |                                              |                                              |                     |
| 1                 | 0.882           | 0.241                       | 0.645                              | 0.317          | 0.317                     | 0.169            | 0.169                       | 0.546            | 0.546                       | NIPALS | 59             | 16.59                                        | 52.46                                        | 39                  |
| 2                 | 0.853           | 0.000                       | 1                                  | 0.359          | 0.562                     | 0.091            | 0.260                       | 0.202            | 0.748                       | NIPALS | 59             | 25.64                                        | 71.08                                        | 50                  |
| 3                 | 0.898           | 1.676                       | 0.206                              | 0.292          | 0.690                     | 0.076            | 0.336                       | 0.111            | 0.859                       | NIPALS | 59             | 32.94                                        | 82.86                                        | 50                  |
| 4                 | 0.871           | 0.131                       | 0.734                              | 0.335          | 0.794                     | 0.049            | 0.385                       | 0.055            | 0.915                       | NIPALS | 59             | 37.48                                        | 89.09                                        | 50                  |
| 5                 | 0.858           | 0.004                       | 0.94                               | 0.353          | 0.866                     | 0.044            | 0.430                       | 0.025            | 0.940                       | NIPALS | 59             | 41.62                                        | 91.47                                        | 50                  |
| 6                 | 0.890           | 0.308                       | 0.578                              | 0.304          | 0.907                     | 0.040            | 0.470                       | 0.017            | 0.957                       |        |                |                                              |                                              |                     |
| 7                 | 0.913           | 0.715                       | 0.429                              | 0.268          | 0.932                     | 0.037            | 0.508                       | 0.011            | 0.968                       |        |                |                                              |                                              |                     |
| 8                 | 0.951           | 1.761                       | 0.173                              | 0.204          | 0.946                     | 0.042            | 0.550                       | 0.007            | 0.975                       |        |                |                                              |                                              |                     |
| 9                 | 0.963           | 1.884                       | 0.173                              | 0.183          | 0.956                     | 0.034            | 0.584                       | 0.006            | 0.981                       |        |                |                                              |                                              |                     |
| 10                | 0.980           | 2.256                       | 0.13                               | 0.154          | 0.963                     | 0.026            | 0.610                       | 0.005            | 0.986                       |        |                |                                              |                                              |                     |
| 11                | 0.989           | 2.327                       | 0.138                              | 0.138          | 0.968                     | 0.024            | 0.634                       | 0.004            | 0.990                       |        |                |                                              |                                              |                     |
| 12                | 1.008           | 2.742                       | 0.101                              | 0.105          | 0.971                     | 0.031            | 0.665                       | 0.002            | 0.992                       |        |                |                                              |                                              |                     |
| 13                | 1.029           | 3.324                       | 0.07                               | 0.067          | 0.973                     | 0.023            | 0.688                       | 0.002            | 0.994                       |        |                |                                              |                                              |                     |
| 14                | 1.055           | 4.051                       | 0.0350*                            | 0.018          | 0.974                     | 0.021            | 0.708                       | 0.001            | 0.996                       |        |                |                                              |                                              |                     |
| 15                | 1.074           | 4.605                       | 0.0200*                            | -0.017         | 0.973                     | 0.018            | 0.726                       | 0.001            | 0.997                       |        |                |                                              |                                              |                     |

KFold Cross Validation with K=5

B

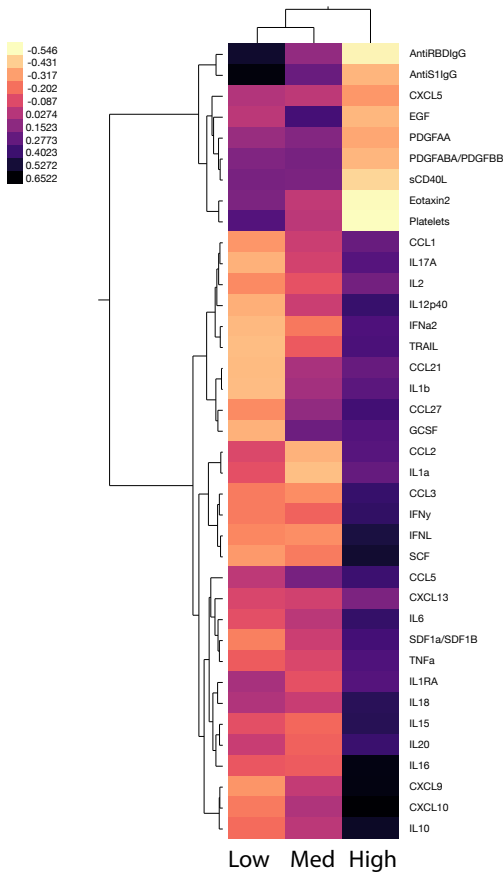

C

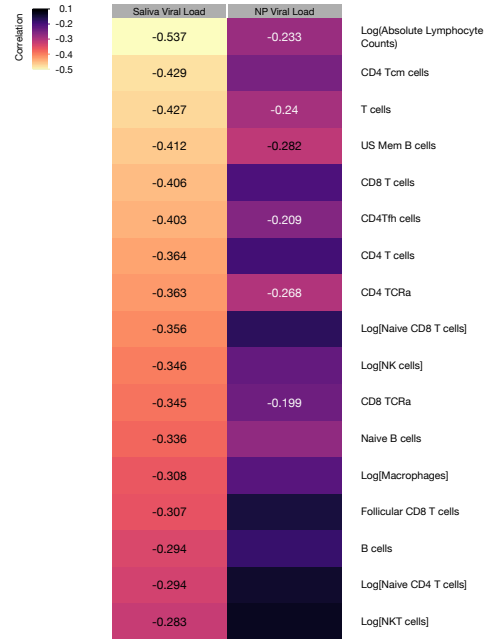

# Extended Figure 4

- Healthcare Worker
- Low Viral Load
- Med Viral Load
- High Viral Load

## Saliva Viral Load

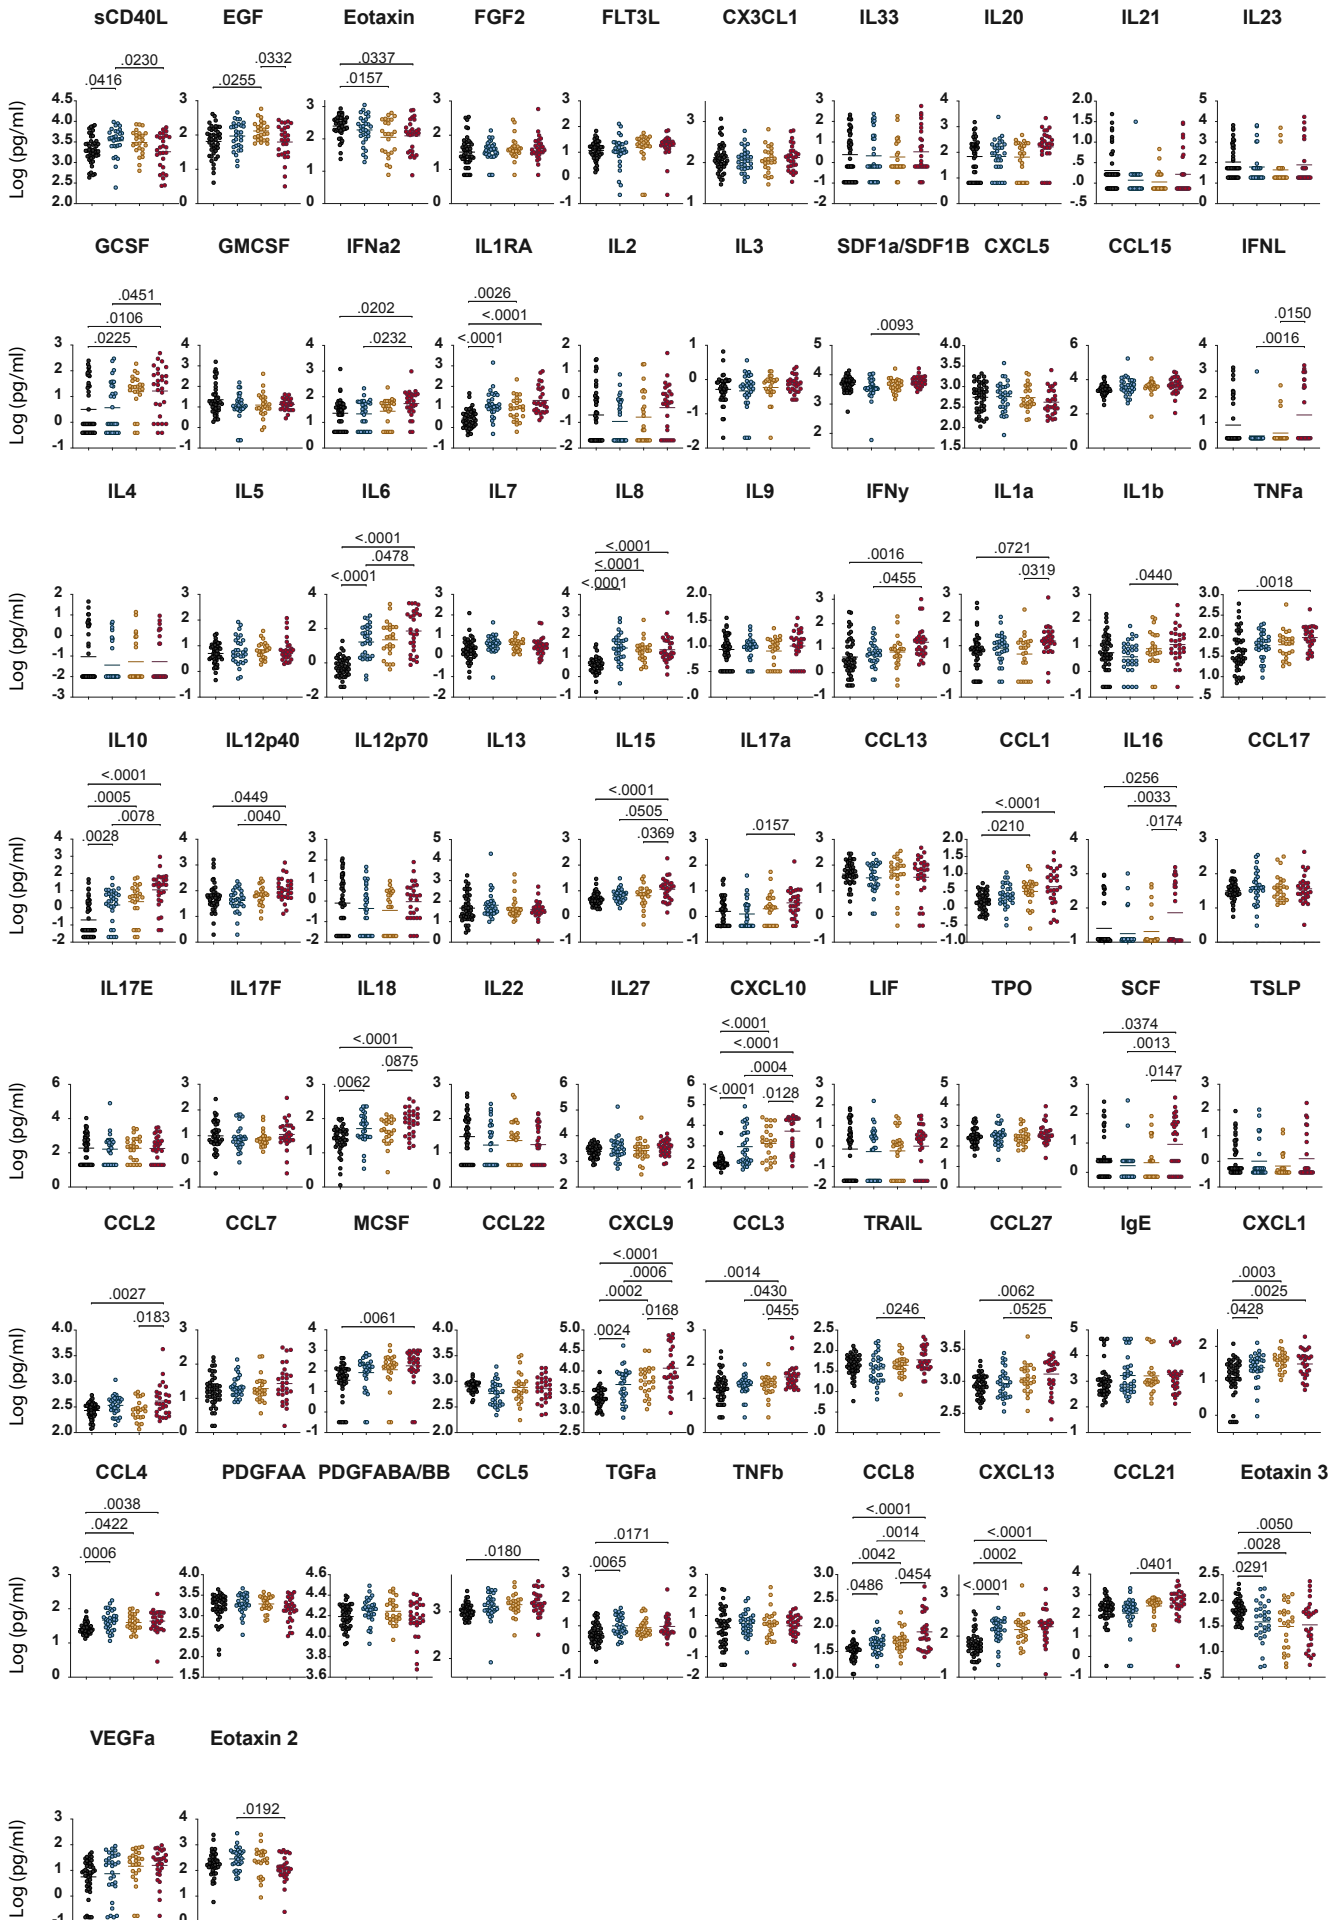

# Extended Figure 5

A

## Saliva Viral Load

- Healthcare Worker
- Low Viral Load
- Med Viral Load
- High Viral Load
- Deceased
- Alive

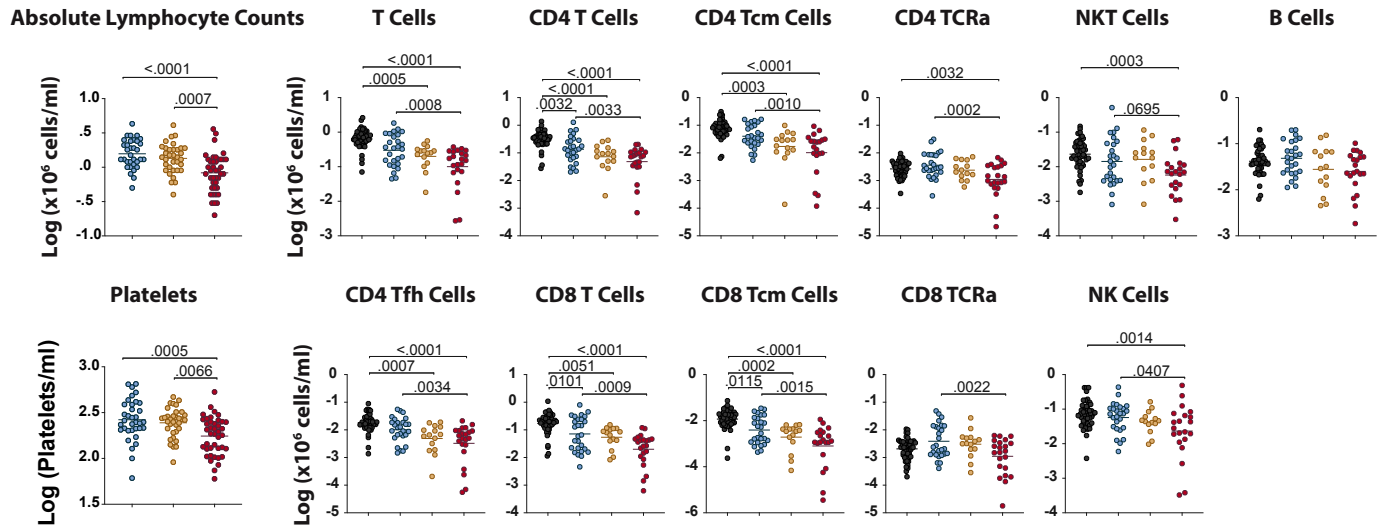

B

## NP Viral Load

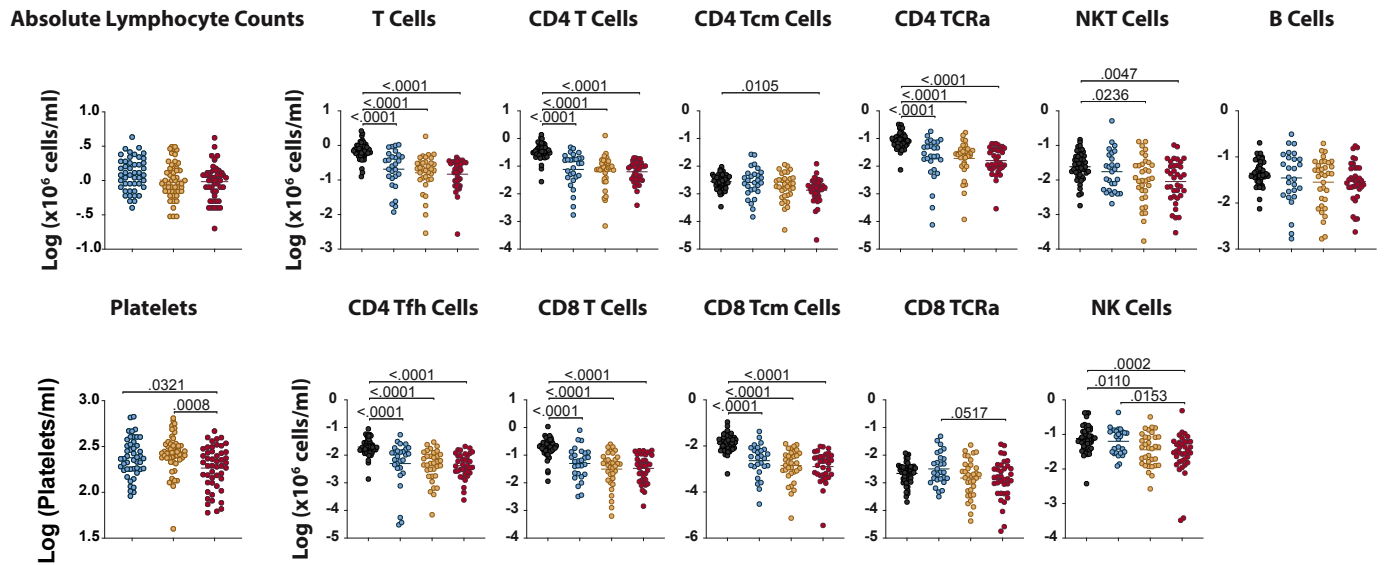

C

## Patient Outcome

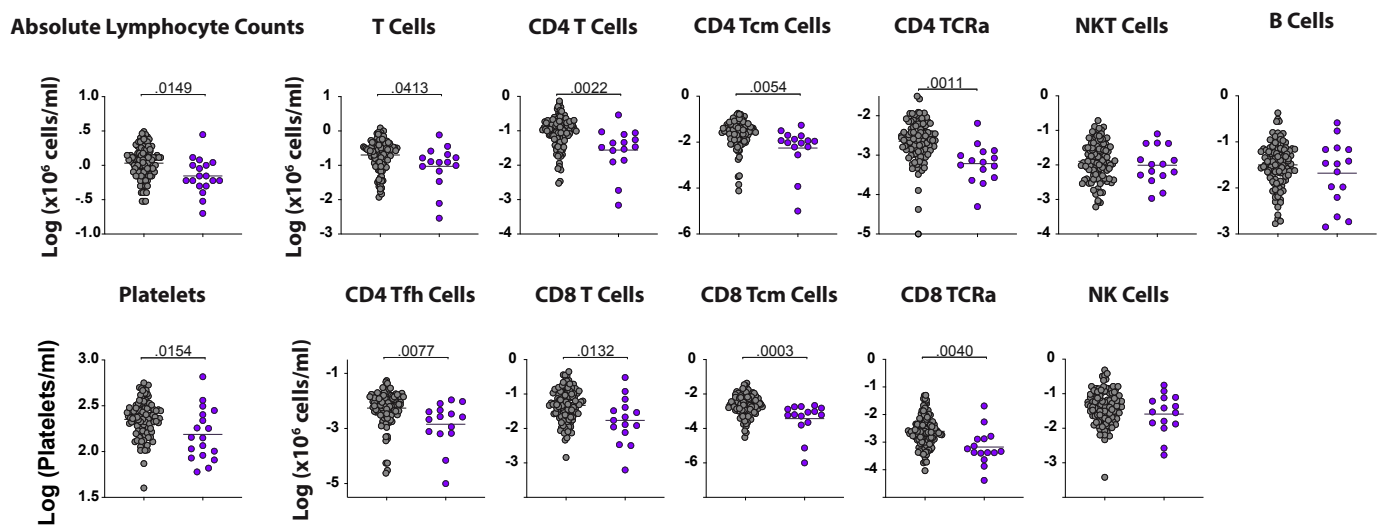

# Extended Figure 6:

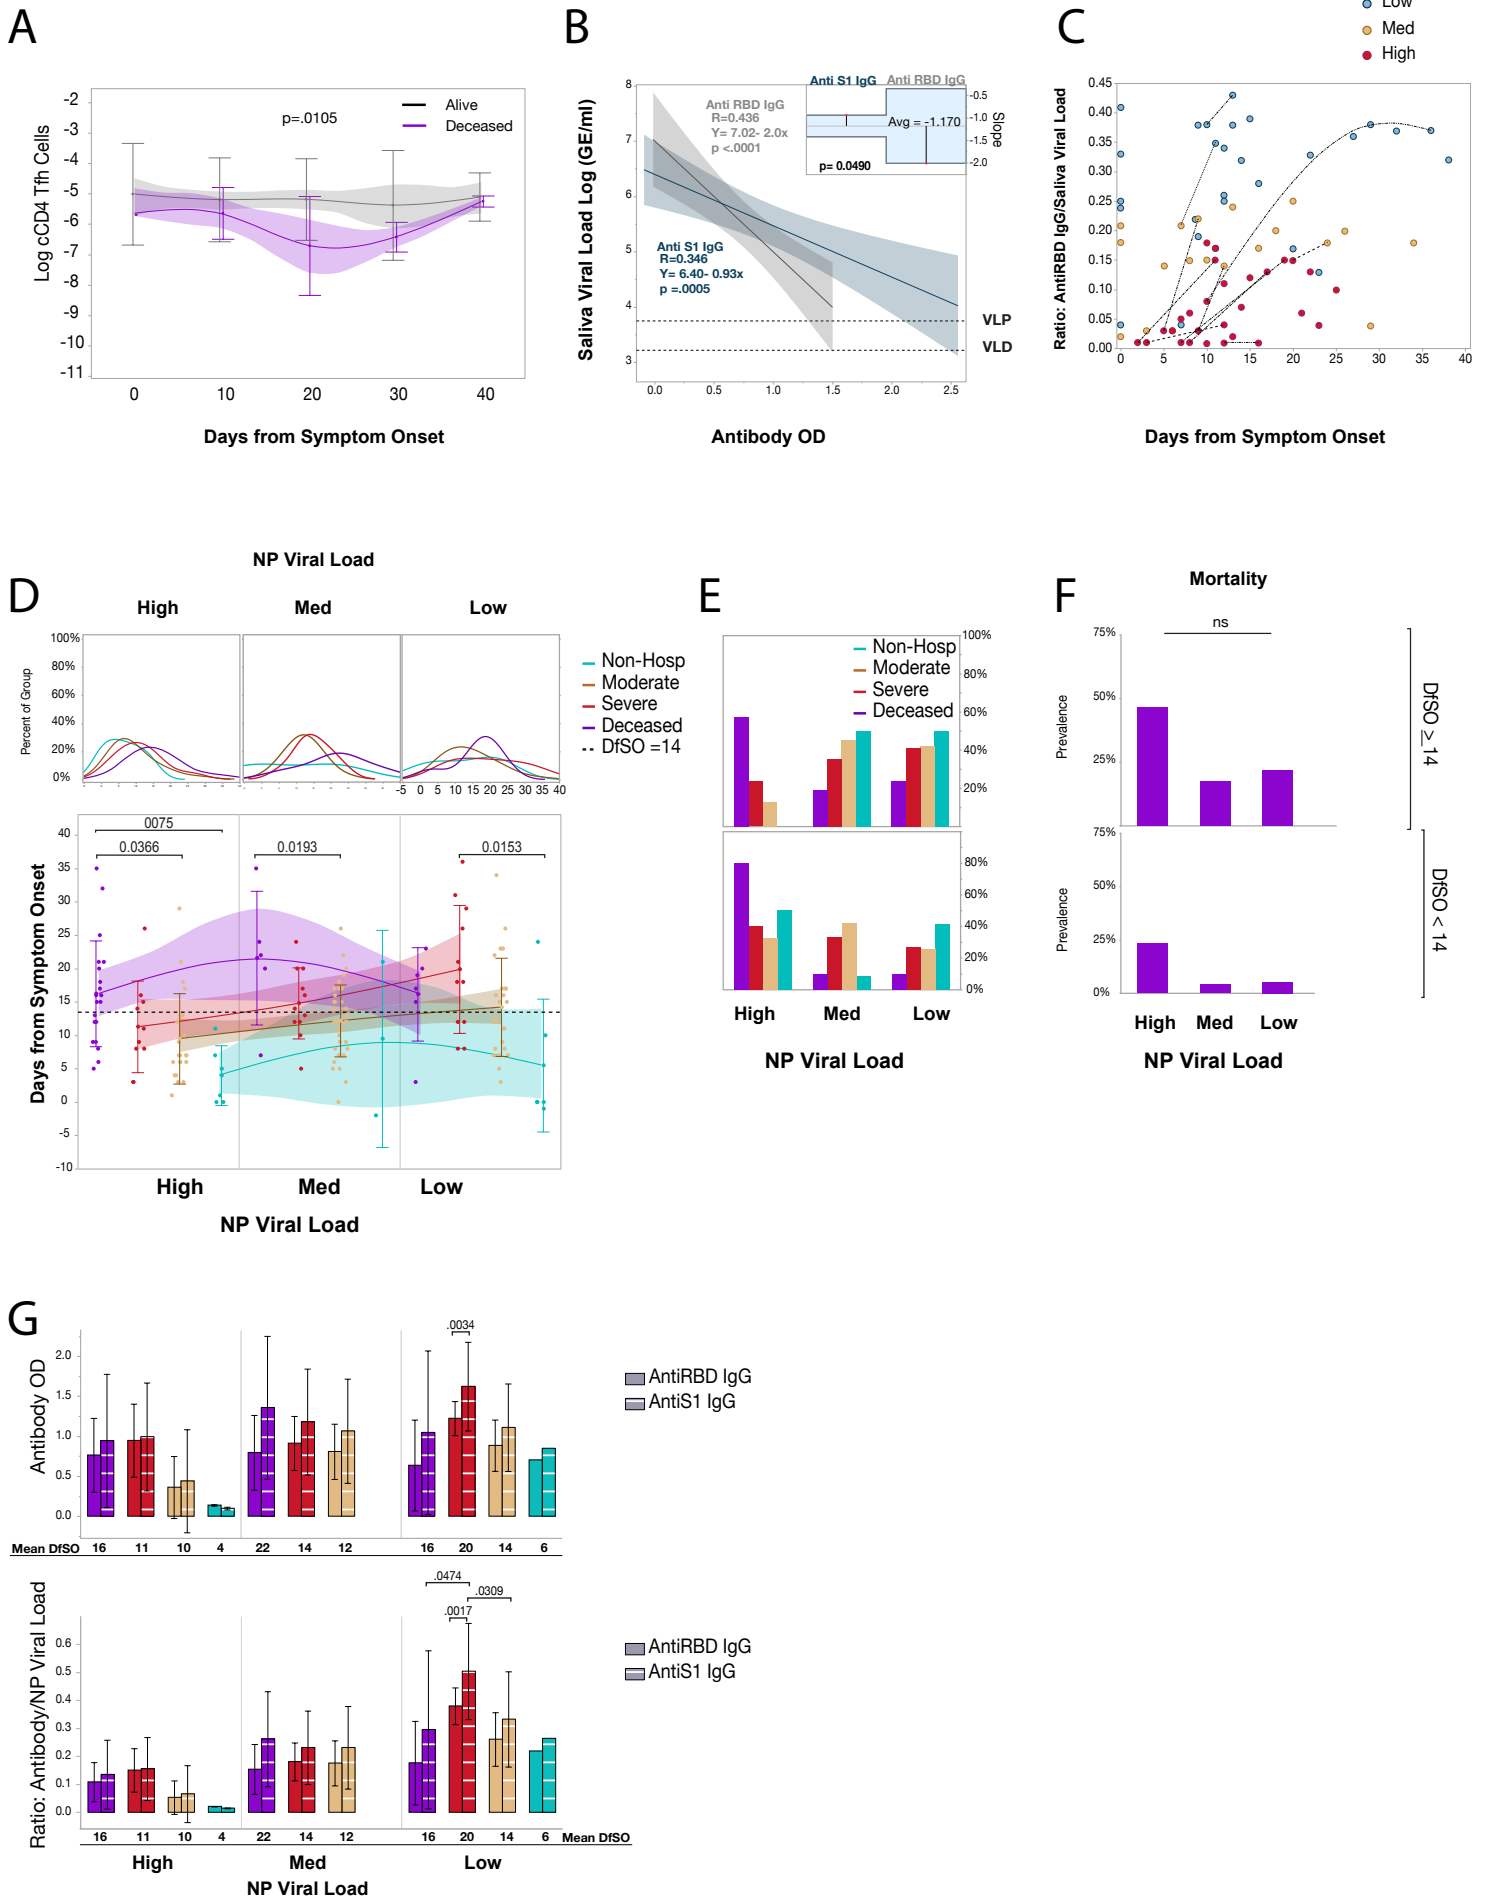

# Extended Figure 7: Gating Strategies for cell populations

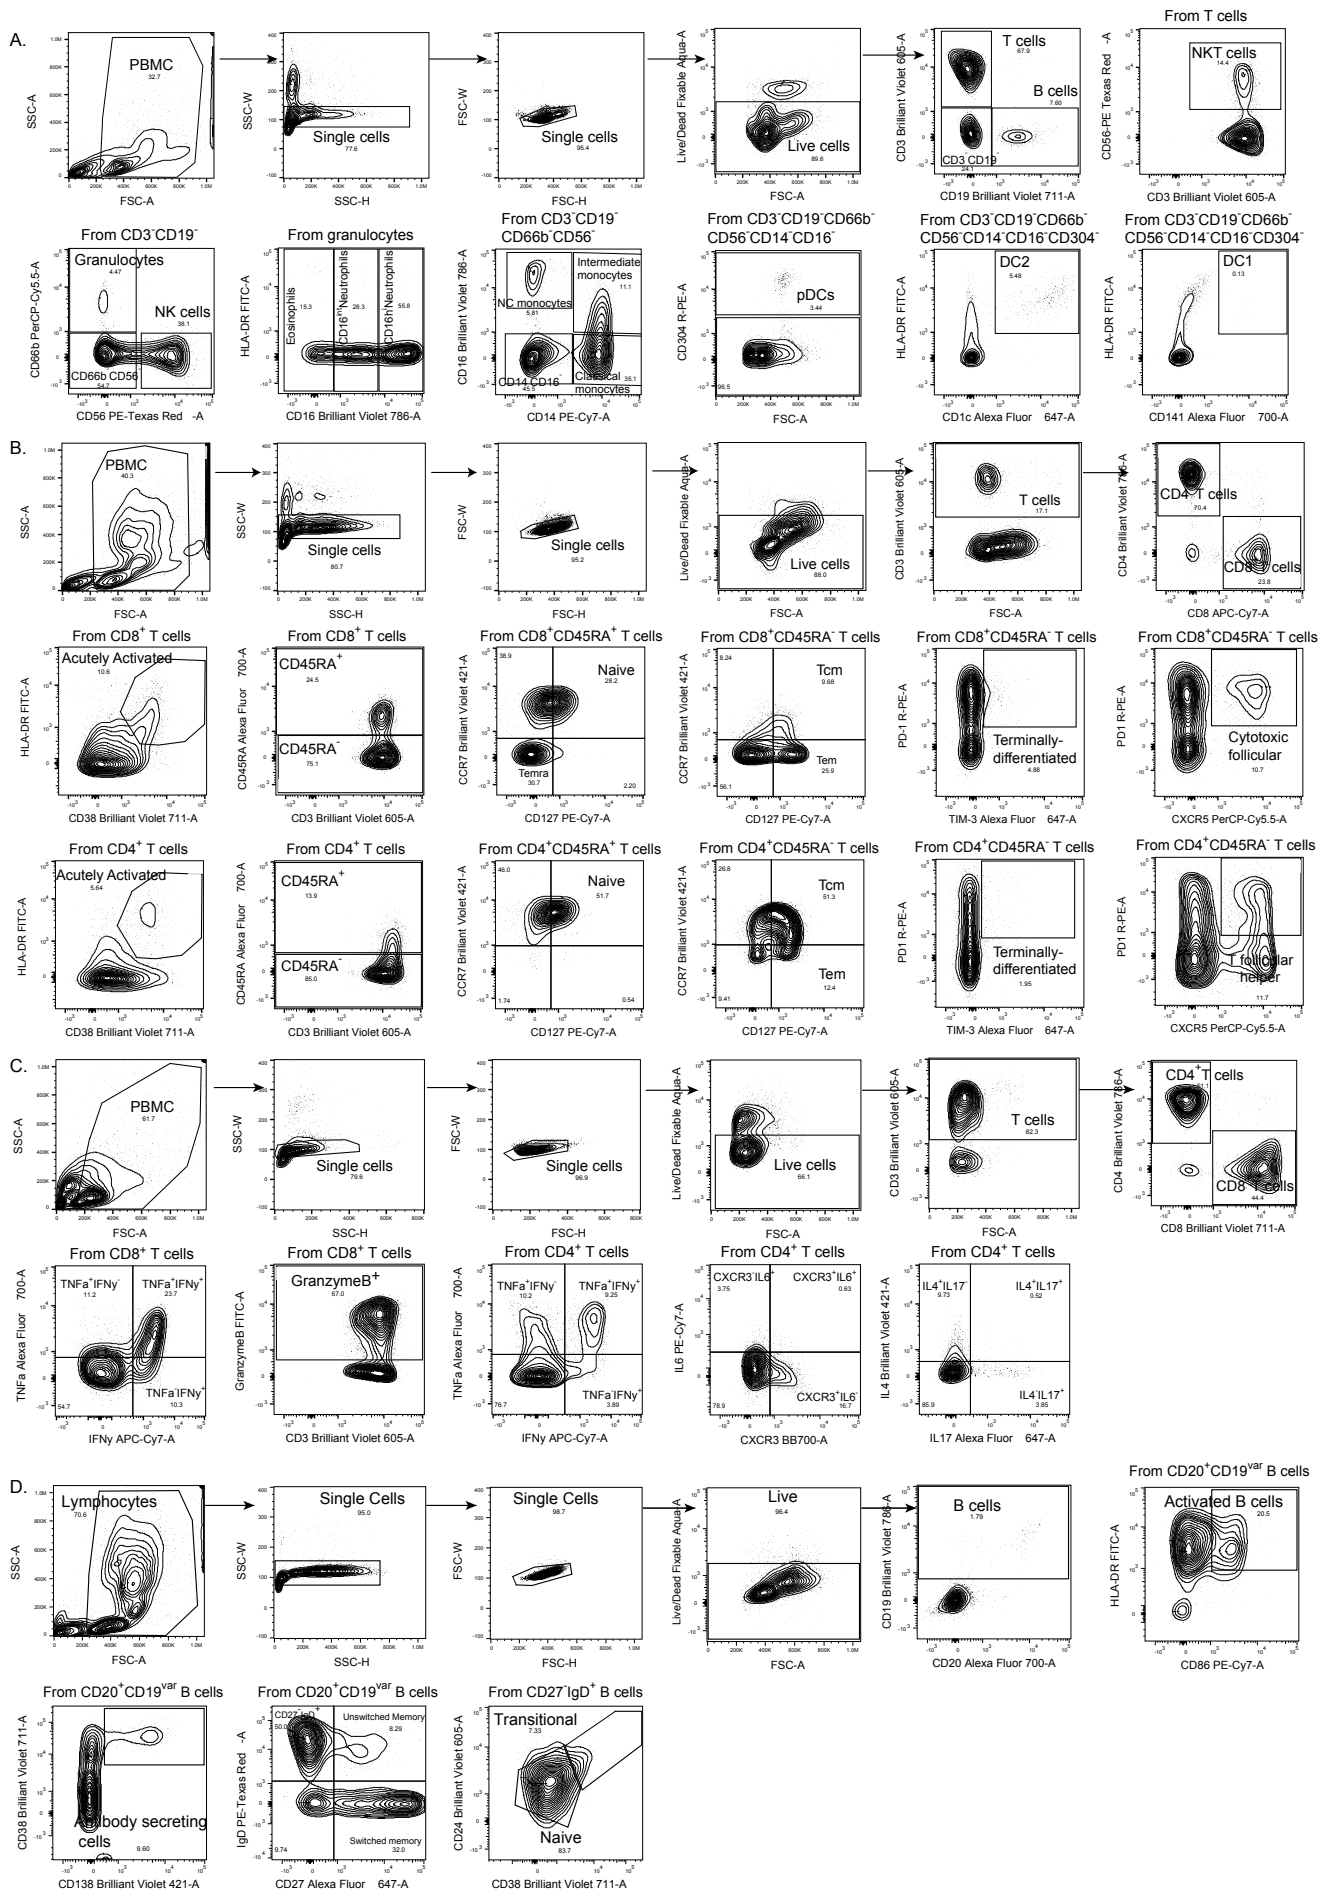

Supplement: media-1.pdf [file media-1.pdf]
