# Supplementary material for: Saliva viral load is a dynamic unifying correlate of COVID-19 severity and mortality
Source: bioRxiv or medRxiv preprint supplement (doi:10.1101/2021.01.04.21249236), 2021-01-10
Supplement: Supplementary file [file media-2.pdf]

**Table 1: Cohort Demographics**

|                                                  | Complete Cohort Demographics  |                                |                                |                                |                                |                                | Disease Severity Amongst Patients Hospitalized for COVID-19 |                               |                                  |                             | Patient Outcome                |                                  |                  |             |
|--------------------------------------------------|-------------------------------|--------------------------------|--------------------------------|--------------------------------|--------------------------------|--------------------------------|-------------------------------------------------------------|-------------------------------|----------------------------------|-----------------------------|--------------------------------|----------------------------------|------------------|-------------|
|                                                  | Uninfected                    |                                | Infected                       |                                |                                |                                | Moderate                                                    | Severe                        | All                              | Alive                       | Deceased                       | All                              |                  |             |
|                                                  | Healthcare Workers            | Not Hospitalized for COVID-19  | Moderate Disease               | Severe Disease                 | Fatal COVID-19                 | Total Cohort                   |                                                             |                               |                                  |                             |                                |                                  |                  |             |
| Summary                                          | N (% Total)                   | N (% Total)                    | N (% Total)                    | N (% Total)                    | N (% Total)                    | N (% Total)                    | N (% Total)                                                 | N (% Total)                   | N (% Total)                      | N (% Total)                 | N (% Total)                    | N (% Total)                      |                  |             |
|                                                  | 109 (38.79%)                  | 26 (9.25%)                     | 81 (28.83%)                    | 42 (14.95%)                    | 23 (8.19%)                     | 281 (100%)                     | 84 (57.53%)                                                 | 62 (42.47%)                   | 146 (100%)                       | 131 (85.06%)                | 23 (14.94%)                    | 154 (100%)                       |                  |             |
| Age                                              | Mean, Std Dev<br>37.39, ±11.7 | Mean, Std Dev<br>37.31, ±14.24 | Mean, Std Dev<br>63.32, ±15.99 | Mean, Std Dev<br>64.57, ±14.47 | Mean, Std Dev<br>71.09, ±18.34 | Mean, Std Dev<br>51.68, ±19.87 | Mean, Std Dev<br>64.12, ±16.40                              | Mean, Std Dev<br>65.89, ±15.7 | Mean, Std Dev<br>64.9, ±16.09    | Mean, Std Dev<br>62, ±16.68 | Mean, Std Dev<br>71.09, ±18.34 | Mean, Std Dev<br>63.36, ±17.18   |                  |             |
| Age Group                                        | N (%)                         | N (%)                          | N (%)                          | N (%)                          | N (%)                          | N (%)                          | N (%)                                                       | N (%)                         | Relative Risk (95% CI), p-value* | N (%)                       | N (%)                          | Relative Risk (95% CI), p-value* |                  |             |
| <59                                              | 105 (96.33%)                  | 22 (84.62%)                    | 30 (37.04%)                    | 12 (28.57%)                    | 4 (17.39%)                     | 173 (61.57%)                   | 30 (35.71%)                                                 | 16 (25.81%)                   | 0.67 (0.39-1.15)                 | 46 (31.51%)                 | 50 (38.17%)                    | 4 (17.39%)                       | 0.48 (0.19-1.19) | 54 (35.06%) |
| 59-74                                            | 4 (3.67%)                     | 4 (15.38%)                     | 28 (34.57%)                    | 17 (40.48%)                    | 7 (30.43%)                     | 60 (21.35%)                    | 28 (33.33%)                                                 | 24 (38.71%)                   | 1.27 (0.61-1.99)                 | 52 (35.62%)                 | 45 (34.35%)                    | 7 (30.43%)                       | 0.8 (0.39-1.65)  | 52 (33.77%) |
| >74                                              | 0 (0%)                        | 0 (0%)                         | 23 (28.4%)                     | 13 (30.95%)                    | 12 (52.17%)                    | 48 (17.08%)                    | 26 (30.95%)                                                 | 22 (35.48%)                   | 1.11 (0.69-1.78)                 | 48 (32.88%)                 | 36 (27.48%)                    | 12 (52.17%)                      | 1.96 (1.22-3.15) | 48 (31.17%) |
| Sex                                              |                               |                                |                                |                                |                                |                                |                                                             |                               |                                  |                             |                                |                                  |                  |             |
| F                                                | 83 (76.15%)                   | 22 (84.62%)                    | 39 (48.15%)                    | 21 (50%)                       | 8 (34.78%)                     | 173 (61.57%)                   | 41 (48.81%)                                                 | 27 (43.55%)                   | 0.80 (0.56-1.16)                 | 68 (46.58%)                 | 66 (50.38%)                    | 8 (34.78%)                       | 0.73 (0.41-1.3)  | 74 (48.05%) |
| M                                                | 26 (23.85%)                   | 4 (15.38%)                     | 42 (51.85%)                    | 21 (50%)                       | 15 (65.22%)                    | 108 (38.43%)                   | 43 (51.19%)                                                 | 35 (56.45%)                   | .86 (0.83-1.53)                  | 78 (53.42%)                 | 65 (49.62%)                    | 15 (65.22%)                      | 1.27 (0.89-1.83) | 80 (51.95%) |
| Race or Ethnicity                                |                               |                                |                                |                                |                                |                                |                                                             |                               |                                  |                             |                                |                                  |                  |             |
| American Indian/ Alaskan native                  | 0 (0%)                        |                                |                                |                                |                                |                                |                                                             |                               | —                                |                             |                                |                                  | —                |             |
| Asian                                            | 7 (6.42%)                     | 1 (3.85%)                      | 1 (1.08%)                      | 0 (0%)                         | 1 (4.35%)                      | 10 (3.56%)                     | 0 (0%)                                                      | 3 (4.84%)                     | —                                | 2 (1.37%)                   | 1 (0.76%)                      | 1 (4.35%)                        | —                | 2 (1.3%)    |
| Black/African American [Not Hispanic/Latin(a/o)] | 6 (5.5%)                      | 3 (11.54%)                     | 24 (29.63%)                    | 15 (50%)                       | 7 (30.43%)                     | 60 (21.35%)                    | 26 (30.95%)                                                 | 25 (40.32%)                   | 1.33 (0.86-2.06)                 | 51 (34.93%)                 | 46 (35.11%)                    | 7 (30.43%)                       | 0.87 (0.45-1.68) | 53 (34.42%) |
| Native Hawaiian/ Pacific Islander                | 0 (0%)                        | 0 (0%)                         | 0 (0%)                         | 0 (0%)                         | 0 (0%)                         | 0 (0%)                         | 0 (0%)                                                      | 0 (0%)                        | —                                | 0 (0%)                      | 0 (0%)                         | 0 (0%)                           | —                | 0 (0%)      |
| White/Caucasian [Not Hispanic/Latin(a/o)]        | 82 (75.23%)                   | 18 (69.23%)                    | 42 (51.85%)                    | 11 (36.67%)                    | 11 (47.83%)                    | 168 (59.79%)                   | 43 (51.19%)                                                 | 24 (38.71%)                   | 0.80 (0.56-1.16)                 | 68 (46.58%)                 | 59 (45.04%)                    | 11 (47.83%)                      | 1.09 (0.69-1.72) | 70 (45.45%) |
| Hispanic/Latin(a/o) of any race                  | 8 (7.34%)                     | 4 (15.38%)                     | 13 (16.05%)                    | 4 (13.33%)                     | 4 (17.39%)                     | 34 (12.10%)                    | 13 (15.48%)                                                 | 9 (14.52%)                    | 1.00 (0.46-2.17)                 | 22 (15.07%)                 | 22 (16.79%)                    | 4 (17.39%)                       | 1.04 (0.4-2.73)  | 26 (16.88%) |
| Multiple                                         | 0 (0%)                        | 0 (0%)                         | 0 (0%)                         | 0 (0%)                         | 0 (0%)                         | 0 (0%)                         | 0 (0%)                                                      | 0 (0%)                        | —                                | 0 (0%)                      | 0 (0%)                         | 0 (0%)                           | —                | 0 (0%)      |
| Unknown                                          | 6 (5.5%)                      | 0 (0%)                         | 2 (2.47%)                      | 0 (0%)                         | 0 (0%)                         | 9 (3.20%)                      | 2 (2.38%)                                                   | 1 (1.61%)                     | —                                | 3 (2.05%)                   | 3 (2.29%)                      | 0 (0%)                           | —                | 3 (1.95%)   |
| HCW/Patient Breakdown                            |                               |                                |                                |                                |                                |                                |                                                             |                               |                                  |                             |                                |                                  |                  |             |
| HCW                                              | 109 (100%)                    | 18 (69.23%)                    | 0 (0%)                         | 0 (0%)                         | 0 (0%)                         | 127 (45.20%)                   | 0 (0%)                                                      | 0 (0%)                        | 0 (0%)                           | 0 (0%)                      | 0 (0%)                         | 0 (0%)                           |                  |             |
| Pateint                                          | 0 (0%)                        | 8 (30.77%)                     | 81 (100%)                      | 42 (100%)                      | 23 (100%)                      | 154 (54.80%)                   | 84 (100%)                                                   | 62 (100%)                     | 146 (100%)                       | 131 (100%)                  | 23 (100%)                      | 154 (100%)                       |                  |             |
| Mortality                                        |                               |                                |                                |                                |                                |                                | 3 (3.57%)                                                   | 20 (32.26%)                   | 8.72 (2.70-28.16), <.0001        |                             |                                |                                  |                  |             |
| Severity                                         |                               |                                |                                |                                |                                |                                |                                                             |                               |                                  |                             |                                |                                  |                  |             |
| MODERATE                                         |                               |                                |                                |                                |                                |                                |                                                             |                               |                                  |                             | 5 (21.74%)                     | 0.29 (0.13-0.63), .001           |                  |             |
| SEVERE                                           |                               |                                |                                |                                |                                |                                |                                                             |                               |                                  |                             | 18 (78.26%)                    | 3.21 (2.2-4.68), .0003           |                  |             |
| Health Risk Factors Amongst Patients             |                               |                                |                                |                                |                                |                                |                                                             |                               |                                  |                             |                                |                                  |                  |             |
| Cancer within 1 year                             | 0 (0%)                        | 11 (13.58%)                    | 4 (9.52%)                      | 5 (21.74%)                     | 20 (12.99%)                    | 12 (14.29%)                    | 8 (12.9%)                                                   | 0.92 (0.40-2.11)              | 20 (13.7%)                       | 15 (11.45%)                 | 5 (21.74%)                     | 2.05 (0.82-5.11)                 | 20 (12.99%)      |             |
| Chronic Heart Disease (CHD)                      | 2 (2.5%)                      | 24 (29.63%)                    | 18 (42.86%)                    | 12 (52.17%)                    | 56 (36.36%)                    | 25 (29.76%)                    | 29 (46.77%)                                                 | 1.54 (1.01-2.36)              | 54 (36.99%)                      | 44 (33.59%)                 | 12 (52.17%)                    | 1.5 (0.92-2.44)                  | 56 (36.36%)      |             |
| Hypertension (HTN)                               | 2 (2.5%)                      | 46 (56.79%)                    | 31 (73.81%)                    | 20 (86.96%)                    | 99 (64.29%)                    | 48 (57.14%)                    | 49 (79.03%)                                                 | 1.38 (1.10-1.73)              | 97 (66.44%)                      | 79 (60.31%)                 | 20 (86.96%)                    | 1.45 (1.16-1.81)                 | 99 (64.29%)      |             |
| Chronic Lung Disease                             | 1 (12.5%)                     | 25 (30.86%)                    | 17 (40.48%)                    | 9 (39.13%)                     | 52 (33.77%)                    | 25 (29.76%)                    | 26 (41.94%)                                                 | 1.38 (0.88-2.15)              | 51 (34.93%)                      | 43 (32.82%)                 | 9 (39.13%)                     | 1.09 (0.6-2.0)                   | 52 (33.77%)      |             |
| Immunosuppression*                               | 1 (12.5%)                     | 43 (53.09%)                    | 25 (59.52%)                    | 17 (73.91%)                    | 86 (55.84%)                    | 45 (53.57%)                    | 40 (64.52%)                                                 | 1.19 (0.91-1.57)              | 85 (58.22%)                      | 69 (52.67%)                 | 17 (73.91%)                    | 1.39 (1.02-1.88)                 | 86 (55.84%)      |             |
| COVID-19 HEALTH RISK FACTORS SUM                 |                               |                                |                                |                                |                                |                                |                                                             |                               |                                  |                             |                                |                                  |                  |             |
| 0                                                | 2 (2.5%)                      | 17 (20.99%)                    | 3 (7.14%)                      | 0 (0%)                         | 22 (14.29%)                    | 17 (20.24%)                    | 3 (4.84%)                                                   | 0.24 (0.07-0.79), .0089       | 20 (13.7%)                       | 22 (16.79%)                 | 0 (0%)                         | 0 (0-0)                          | 22 (14.29%)      |             |
| 1                                                | 6 (7.5%)                      | 17 (20.99%)                    | 10 (23.81%)                    | 4 (17.39%)                     | 37 (24.03%)                    | 18 (21.43%)                    | 13 (20.97%)                                                 | 0.99 (0.53-1.87)              | 31 (21.23%)                      | 33 (25.19%)                 | 4 (17.39%)                     | 0.74 (0.29-1.89)                 | 37 (24.03%)      |             |
| 2                                                | 0 (0%)                        | 21 (25.93%)                    | 12 (28.57%)                    | 5 (21.74%)                     | 38 (24.68%)                    | 22 (26.19%)                    | 16 (25.81%)                                                 | 1.00 (0.58-1.74)              | 38 (26.03%)                      | 33 (25.19%)                 | 5 (21.74%)                     | 0.89 (0.39-2.05)                 | 38 (24.68%)      |             |
| 3                                                | 0 (0%)                        | 17 (20.99%)                    | 8 (19.05%)                     | 7 (30.43%)                     | 32 (20.78%)                    | 18 (21.43%)                    | 14 (22.58%)                                                 | 1.07 (0.58-1.98)              | 32 (21.92%)                      | 25 (19.08%)                 | 7 (30.43%)                     | 1.67 (0.82-3.4)                  | 32 (20.78%)      |             |
| 4+                                               | 0 (0%)                        | 9 (11.11%)                     | 9 (21.43%)                     | 7 (30.43%)                     | 25 (16.23%)                    | 9 (10.71%)                     | 16 (25.81%)                                                 | 2.30 (1.08-4.90), .0442       | 25 (17.12%)                      | 18 (13.74%)                 | 7 (30.43%)                     | 2.02 (0.9-4.56)                  | 25 (16.23%)      |             |

**Table 2: Logistic Regression Reports**

| Disease Severity                              | Predictor                                   | Odds Ratio       |           |           | p value | AUC     |
|-----------------------------------------------|---------------------------------------------|------------------|-----------|-----------|---------|---------|
|                                               |                                             | (per unit)       | Lower 95% | Upper 95% |         |         |
| Disease Severity                              | Saliva Viral Load                           | 1.58             | 1.17      | 2.13      | 0.0012  | 0.71    |
|                                               | NP Viral Load                               | 1.01             | 0.80      | 1.28      | ns      | 0.51    |
|                                               | Age                                         | 1.00             | 0.98      | 1.02      | ns      | 0.51    |
|                                               | Days from Symptom Onset                     | 1.03             | 0.98      | 1.09      | ns      | 0.58    |
| <b>With Days from Symptom Onset</b>           |                                             |                  |           |           |         |         |
| Saliva Viral Load and Days from Symptom Onset |                                             |                  |           |           | <.0001* | 0.79    |
|                                               | Saliva Viral Load                           | 2.03             | 1.36      | 3.03      | <.0001* |         |
|                                               | Days from Symptom Onset                     | 1.11             | 1.03      | 1.20      | 0.0021* |         |
| NP Viral Load and Days from Symptom Onset     |                                             |                  |           |           | 0.0144  | 0.68    |
|                                               | NP Viral Load                               | 1.17             | 0.89      | 1.54      | ns      |         |
|                                               | Days from Symptom Onset                     | 1.10             | 1.03      | 1.18      | 0.0036* |         |
| <b>Mortality</b>                              |                                             |                  |           |           |         |         |
|                                               | Saliva Viral Load                           | 2.21             | 1.35      | 3.60      | 0.0001* | 0.83    |
|                                               | NP Viral Load                               | 1.23             | 0.92      | 1.64      | ns      | 0.58    |
|                                               | Age                                         | 1.03             | 1.00      | 1.07      | 0.0376* | 0.63    |
|                                               | Days from Symptom Onset                     | 1.02             | 0.96      | 1.09      | ns      | 0.55    |
| <b>With Days from Symptom Onset</b>           |                                             |                  |           |           |         |         |
| Saliva Viral Load and Days from Symptom Onset |                                             |                  |           |           | <.0001* | 0.90    |
|                                               | Saliva Viral Load                           | 3.69             | 1.69      | 8.04      | <.0001* |         |
|                                               | Days from Symptom Onset                     | 1.18             | 1.05      | 1.33      | 0.0011* |         |
| NP Viral Load and Days from Symptom Onset     |                                             |                  |           |           | 0.0619  | 0.67    |
|                                               | NP Viral Load                               | 1.40             | 1.00      | 1.95      | 0.0452* |         |
|                                               | Days from Symptom Onset                     | 1.08             | 1.00      | 1.16      | 0.0560  |         |
| <b>Full Spectrum of Disease</b>               |                                             |                  |           |           |         |         |
|                                               |                                             | Likelihood Ratio |           |           |         |         |
| Saliva Viral Load and Days from Symptom Onset |                                             |                  |           |           | 40.12   | <.0001* |
|                                               | Saliva Viral Load                           | 39.04            |           |           | <.0001* |         |
|                                               | Days from Symptom Onset                     | 67.78            |           |           | <.0001* |         |
|                                               | Saliva Viral Load * Days from Symptom Onset | 9.96             |           |           | 0.0016  |         |
|                                               | Non-Hospitalized                            |                  |           |           |         | —       |
|                                               | Moderate                                    |                  |           |           |         | 0.96    |
|                                               | Severe                                      |                  |           |           |         | 0.89    |
|                                               | Fatal                                       |                  |           |           |         | 0.91    |
| NP Viral Load and Days from Symptom Onset     |                                             |                  |           |           | 7.69    | 0.0015  |
|                                               | NP Viral Load                               | 4.65             |           |           | 0.0311  |         |
|                                               | Days from Symptom Onset                     | 14.90            |           |           | 0.0001  |         |
|                                               | NP Viral Load * Days from Symptom Onset     | 1.12             |           |           | ns      |         |
|                                               | Non-Hospitalized                            |                  |           |           |         | —       |
|                                               | Moderate                                    |                  |           |           |         | 0.75    |
|                                               | Severe                                      |                  |           |           |         | 0.66    |
|                                               | Fatal                                       |                  |           |           |         | 0.67    |

# Extended Table 3

| Term              | Least Squares Mean Difference, (95% CI) p value |               |        | Least Squares Mean Difference, (95% CI) p value |               |                         | RESTRICTED MAXIMUM LIKLIHOOD |            |       |         | RESTRICTED MAXIMUM LIKLIHOOD |                        |        |         |
|-------------------|-------------------------------------------------|---------------|--------|-------------------------------------------------|---------------|-------------------------|------------------------------|------------|-------|---------|------------------------------|------------------------|--------|---------|
|                   | Saliva Viral Load                               | NP Viral Load |        | Saliva Viral Load                               | NP Viral Load |                         | Estimate                     | R adjusted | RMSE  | p value | Estimate                     | R adjusted             | RMSE   | p value |
| <b>T cells</b>    | <b>**</b>                                       |               |        | <b>*</b>                                        |               |                         |                              |            |       |         |                              |                        |        |         |
| Age               |                                                 |               |        |                                                 |               |                         |                              |            |       |         |                              |                        |        |         |
| Viral Load Levels |                                                 |               |        |                                                 |               |                         |                              |            |       |         |                              |                        |        |         |
| HCW vs High       | 1.3 (0.7-1.91)                                  | <0.001        | 0.0076 | 0.97 (0.44-1.51)                                | 0.0004        | 0.0076, (-0.0047)       | 0.0076, (-0.0047)            | 0.957      | 0.162 | 0.0024  | 0.0021                       | 0.162                  | 0.0024 | 0.011   |
| Low vs High       | 0.89 (0.34-1.43)                                | 0.0015        | 0.0015 | 0.2, (-0.3-0.7)                                 | 0.440         | 0.0007, (-0.0012)       | 0.0007, (-0.0012)            |            |       |         |                              |                        |        | 0.512   |
| Med vs High       | 0.61 (-0.1-1.23)                                | 0.052         | 0.052  | 0.02, (-0.45-0.49)                              | 0.943         |                         |                              |            |       |         |                              |                        |        |         |
|                   |                                                 |               |        |                                                 |               |                         |                              | 0.964      | 0.061 | 0.0067  |                              | 0.969                  | 0.042  | 0.1472  |
| Age               |                                                 |               | 0.0011 |                                                 | 0.0036        | Saliva Viral Load       | 0.0011, (-0.0036)            |            |       | 0.0027  | NP Viral Load                | -0.009, (-0.019-0)     |        | 0.055   |
| Viral Load Levels |                                                 |               | 0.007  |                                                 | 0.0034        | Days from Symptom Onset | 0.007, (-0.0034)             |            |       | 0.0471  | Days from Symptom Onset      | 0, (-0.003-0.002)      |        | 0.791   |
| HCW vs High       | 1.27 (0.54-2.1)                                 | 0.0006        | 0.0006 | 0.97, (0.33-1.6)                                | 0.003         |                         |                              |            |       |         |                              |                        |        |         |
| Low vs High       | 0.97 (0.3-1.64)                                 | 0.0046        | 0.0046 | 0.24, (-0.38-0.84)                              | 0.430         |                         |                              |            |       |         |                              |                        |        |         |
| Med vs High       | 0.89 (0.13-1.64)                                | 0.0212        | 0.0212 | -0.15, (-0.72-0.41)                             | 0.589         |                         |                              |            |       |         |                              |                        |        |         |
|                   |                                                 |               |        |                                                 |               |                         |                              | 0.979      | 0.003 | 0.0001  |                              | 0.959                  | 0.003  | 0.0558  |
| Age               |                                                 |               | 0.0735 |                                                 | 0.0488        | Saliva Viral Load       | 0.0735, (-0.0488)            |            |       | 0.0002  | NP Viral Load                | -0.001, (-0.001-0)     |        | 0.017   |
| Viral Load Levels |                                                 |               | 0.0004 |                                                 | <0.001        | Days from Symptom Onset | 0.0004, (-<0.001)            |            |       | 0.0002  | Days from Symptom Onset      | 0, (0-0)               |        | 0.486   |
| HCW vs High       | 2.1 (1.16-3.5)                                  | <0.001        | <0.001 | 1.73, (0.95-2.51)                               | <0.001        |                         |                              |            |       |         |                              |                        |        |         |
| Low vs High       | 1.39 (0.51-2.26)                                | 0.0019        | 0.0019 | 0.46, (-0.28-1.2)                               | 0.223         |                         |                              |            |       |         |                              |                        |        |         |
| Med vs High       | 0.81 (-0.17-1.78)                               | 0.1050        | 0.1050 | 0.03, (-0.66-0.72)                              | 0.935         |                         |                              |            |       |         |                              |                        |        |         |
|                   |                                                 |               |        |                                                 |               |                         |                              | 0.989      | 0.062 | 0.0271  |                              | 0.984                  | 0.048  | 0.0956  |
| Age               |                                                 |               | 0.0159 |                                                 | 0.0077        | Saliva Viral Load       | 0.0159, (-0.0077)            |            |       | 0.0133  | NP Viral Load                | -0.012, (-0.024-0.001) |        | 0.037   |
| Viral Load Levels |                                                 |               | 0.0027 |                                                 | 0.0004        | Days from Symptom Onset | 0.0027, (-0.0004)            |            |       | 0.022   | Days from Symptom Onset      | 0, (-0.003-0.003)      |        | 0.893   |
| HCW vs High       | 1.28 (0.61-1.95)                                | 0.0002        | 0.0002 | 1.07, (0.48-1.66)                               | 0.0004        |                         |                              |            |       |         |                              |                        |        |         |
| Low vs High       | 0.83 (0.21-1.44)                                | 0.0087        | 0.0087 | 0.05, (-0.5-0.61)                               | 0.8469        |                         |                              |            |       |         |                              |                        |        |         |
| Med vs High       | 0.33 (-0.37-1.3)                                | 0.3525        | 0.3525 | -0.03, (-0.55-0.49)                             | 0.9076        |                         |                              |            |       |         |                              |                        |        |         |
|                   |                                                 |               |        |                                                 |               |                         |                              | 0.947      | 0.02  | p<0.001 |                              | 0.96                   | 0.015  | 0.0091  |
| Age               |                                                 |               | 0.206  |                                                 | 0.0769        | Saliva Viral Load       | 0.206, (-0.0769)             |            |       | 0.0003  | NP Viral Load                | -0.005, (-0.009-0.002) |        | 0.002   |
| Viral Load Levels |                                                 |               | 0.0009 |                                                 | 0.0046        | Days from Symptom Onset | 0.0009, (-0.0046)            |            |       | 0.0003  | Days from Symptom Onset      | 0, (-0.001-0)          |        | 0.347   |
| HCW vs High       | 1.6 (0.79-2.4)                                  | <0.001        | <0.001 | 1.11, (0.41-1.81)                               | 0.0019        |                         |                              |            |       |         |                              |                        |        |         |
| Low vs High       | 1.25 (0.5-1.99)                                 | 0.0010        | 0.0010 | 0.03, (-0.63-0.7)                               | 0.9199        |                         |                              |            |       |         |                              |                        |        |         |
| Med vs High       | 0.47 (-0.36-1.3)                                | 0.2645        | 0.2645 | 0.12, (-0.5-0.73)                               | 0.7142        |                         |                              |            |       |         |                              |                        |        |         |
|                   |                                                 |               |        |                                                 |               |                         |                              | 0.969      | 0.005 | 0.0004  |                              | 0.957                  | 0.004  | 0.0174  |
| Age               |                                                 |               | 0.0558 |                                                 | 0.0101        | Saliva Viral Load       | 0.0558, (-0.0101)            |            |       | 0.0009  | NP Viral Load                | -0.001, (-0.002-0)     |        | 0.005   |
| Viral Load Levels |                                                 |               | 0.0094 |                                                 | 0.0155        | Days from Symptom Onset | 0.0094, (-0.0155)            |            |       | 0.0009  | Days from Symptom Onset      | 0, (0-0)               |        | 0.423   |
| HCW vs High       | 1.18 (0.45-1.92)                                | 0.0016        | 0.0016 | 0.88, (0.21-1.55)                               | 0.0099        |                         |                              |            |       |         |                              |                        |        |         |
| Low vs High       | 0.96 (0.28-1.63)                                | 0.0052        | 0.0052 | 0.03, (-0.6-0.66)                               | 0.9283        |                         |                              |            |       |         |                              |                        |        |         |
| Med vs High       | 0.33 (-0.42-1.9)                                | 0.3864        | 0.3864 | -0.08, (-0.67-0.51)                             | 0.7801        |                         |                              |            |       |         |                              |                        |        |         |
|                   |                                                 |               |        |                                                 |               |                         |                              | 0.94       | 0.003 | 0.0219  |                              | 0.981                  | 0.001  | 0.0026  |
| Age               |                                                 |               | 0.1573 |                                                 | 0.1958        | Saliva Viral Load       | 0.1573, (-0.1958)            |            |       | 0.0077  | NP Viral Load                | -0.001, (-0.001-0)     |        | 0.001   |
| Viral Load Levels |                                                 |               | 0.0042 |                                                 | 0.2048        | Days from Symptom Onset | 0.0042, (-0.2048)            |            |       | 0.1563  | Days from Symptom Onset      | 0, (0-0)               |        | 0.876   |
| HCW vs High       | 0.49 (-0.16-1.14)                               | 0.1408        | 0.1408 | 0.35, (-0.21-0.91)                              | 0.2249        |                         |                              |            |       |         |                              |                        |        |         |
| Low vs High       | 1.7 (0.48-1.66)                                 | 0.0004        | 0.0004 | 0.58, (0.05-1.11)                               | 0.0315        |                         |                              |            |       |         |                              |                        |        |         |
| Med vs High       | 0.72 (0.4-1.4)                                  | 0.0391        | 0.0391 | 0.26, (-0.24-0.76)                              | 0.3089        |                         |                              |            |       |         |                              |                        |        |         |
|                   |                                                 |               |        |                                                 |               |                         |                              | 0.923      | 0.005 | 0.0668  |                              | 0.949                  | 0.004  | 0.0672  |
| Age               |                                                 |               | 0.0178 |                                                 | 0.0105        | Saliva Viral Load       | 0.0178, (-0.0105)            |            |       | 0.0206  | NP Viral Load                | -0.001, (-0.002-0)     |        | 0.043   |
| Viral Load Levels |                                                 |               | 0.0011 |                                                 | 0.0476        | Days from Symptom Onset | 0.0011, (-0.0476)            |            |       | 0.806   | Days from Symptom Onset      | 0, (0-0)               |        | 0.632   |
| HCW vs High       | -0.6 (-0.84-0.71)                               | 0.8770        | 0.8770 | -0.22, (-0.94-0.5)                              | 0.5534        |                         |                              |            |       |         |                              |                        |        |         |
| Low vs High       | 1.2 (0.31-1.73)                                 | 0.0047        | 0.0047 | 0.72, (0.04-1.4)                                | 0.0386        |                         |                              |            |       |         |                              |                        |        |         |
| Med vs High       | 0.92 (0.12-1.72)                                | 0.0235        | 0.0235 | 0.03, (-0.61-0.67)                              | 0.9229        |                         |                              |            |       |         |                              |                        |        |         |
|                   |                                                 |               |        |                                                 |               |                         |                              | 0.944      | 0.408 | p<0.001 |                              | 0.834                  | 0.543  | 0.0216  |
| Age               |                                                 |               |        |                                                 |               | Saliva Viral Load       | -0.19, (-0.269-0.112)        |            |       | p<0.001 | NP Viral Load                | -0.061, (-0.136-0.013) |        | 0.107   |
| Viral Load Levels |                                                 |               |        |                                                 |               | Days from Symptom Onset | 0.002, (-0.016-0.019)        |            |       | 0.863   | Days from Symptom Onset      | 0.015, (-0.002-0.032)  |        | 0.089   |

\*\* Log (x10<sup>6</sup> cells/ml), \* Standard cell counts (x10<sup>6</sup> cells/ml)
